# Supplementary material for: Deciphering the role of LiBr as a redox mediator in Li–O 2 aprotic batteries
Source: Royal Society of Chemistry journal article supplement (doi:10.1039/d5ta04150c), 2025-10-21
Supplement: d5ta04150c1.pdf [file d5ta04150c1.pdf]

## Supporting Information

# Deciphering the role of LiBr as redox mediator in Li-O<sub>2</sub> Aprotic Batteries

*Angelica Petrongari* <sup>[a]</sup>, *Lucrezia Desiderio* <sup>[a]</sup>, *Adriano Pierini* <sup>[a]</sup>, *Enrico Bodo* <sup>[a]</sup>, *Mauro Giustini* <sup>[a]</sup>, *Sergio Brutti* <sup>[a,b,c]</sup>

<sup>[a]</sup> Department of Chemistry, Sapienza University of Rome, P.le Aldo Moro 5, Rome, 00185, Italy.

<sup>[b]</sup> CNR-ISC, Consiglio Nazionale delle Ricerche, Istituto dei Sistemi Complessi, Rome, 00185, Italy.

<sup>[c]</sup> GISEL – Centro di Riferimento Nazionale per i Sistemi di Accumulo Elettrochimico di Energia, Florence, 50121, Italy.

\*Email: [sergio.brutti@uniroma1.it](mailto:sergio.brutti@uniroma1.it)

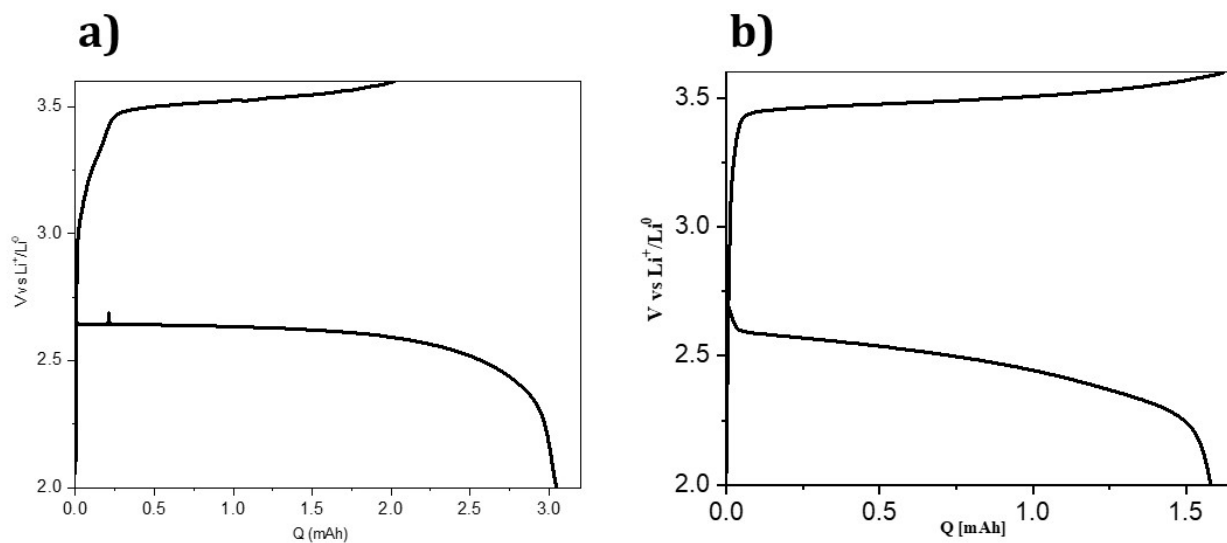

**Figure S1:** Discharge/charge profiles of a Li-O<sub>2</sub> cell cycled at 0.1 mA/cm<sup>2</sup> between 2.0 and 3.6 V vs. Li<sup>+</sup>/Li<sup>0</sup>, with no capacity limit, using a) LiTFSI 1M + LiBr 100 mM in DME electrolyte (1 bar of pre-loaded O<sub>2</sub>) and b) LiTFSI 1M + LiBr 200 mM in DME electrolyte (0.8 bar of pre-loaded O<sub>2</sub>). N.B. The capacity difference is owed to a different pre-loading of O<sub>2</sub> in the cell headspace.

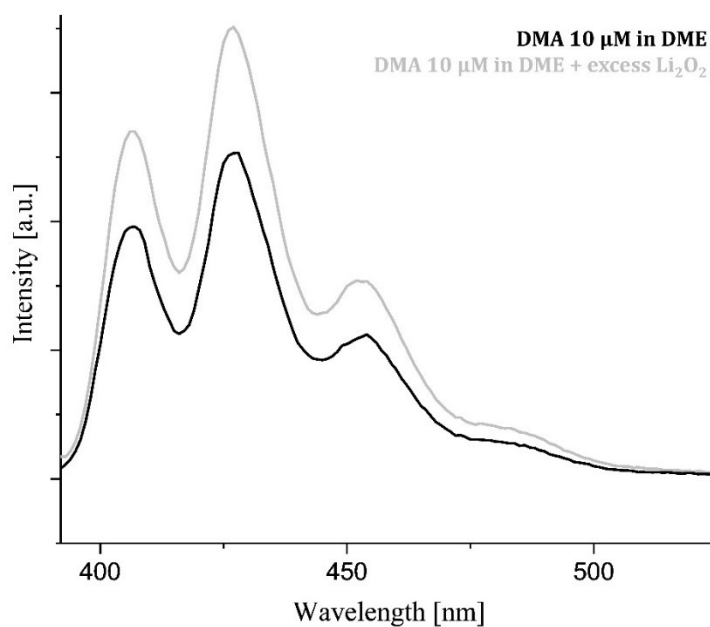

**Figure S2:** Fluorescence spectra of a solution of DMA 10 μM in DME before (black) and after (grey) adding excess Li<sub>2</sub>O<sub>2</sub>.

**Table S1:** Integration of DMA signals and corresponding values of intensity increase upon adding Li<sub>2</sub>O<sub>2</sub>.

|           | Sample (in DME)                                                           | Signal integral [a.u] | DMA Fluorescence increase after adding Li <sub>2</sub> O <sub>2</sub> |
|-----------|---------------------------------------------------------------------------|-----------------------|-----------------------------------------------------------------------|
| Figure 2b | DMA 10μM + LiBr <sub>3</sub> 10μM + excess Li <sub>2</sub> O <sub>2</sub> | 2160                  | 40,1%                                                                 |
|           | DMA 10μM + LiBr <sub>3</sub> 10μM                                         | 1542                  |                                                                       |
| Figure S1 | DMA 10μM + excess Li <sub>2</sub> O <sub>2</sub>                          | 3025                  | 40,2%                                                                 |
|           | DMA 10μM                                                                  | 2157                  |                                                                       |

**Boltzmann distribution of states.** The amount of release of <sup>1</sup>O<sub>2</sub> during ORR in absence of other preferential reaction routes is determined by the Boltzmann factor. Being the difference in energy between the triplet and singlet states of molecular oxygen 0.97 eV<sup>1</sup>, the ratio P(<sup>1</sup>O<sub>2</sub>)/P(<sup>3</sup>O<sub>2</sub>) at room temperature can be calculated according to Eq. S1.

**Equation S1**

$$\frac{P(^1O_2)}{P(^3O_2)} = e^{\frac{\Delta E}{k_B t}} = 3.939 \cdot 10^{-17}$$

Thus, the probability associated to the formation of <sup>1</sup>O<sub>2</sub> is almost negligible in this case.

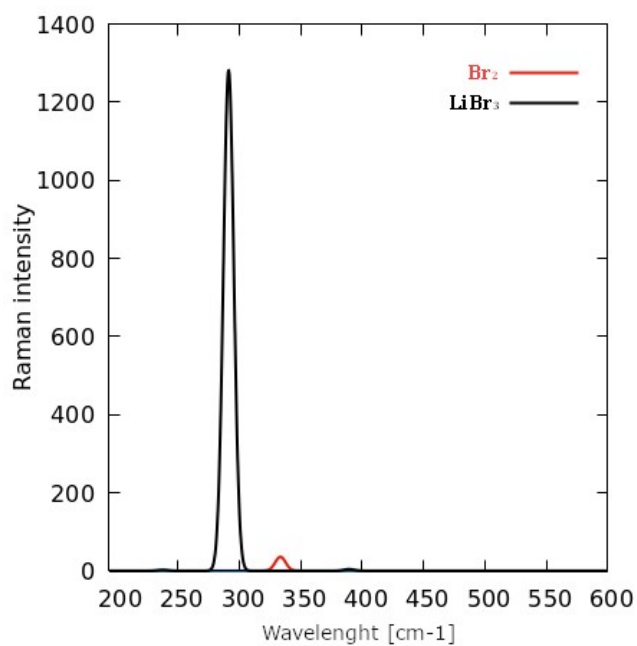

**Figure S3:** Simulation of  $\text{LiBr}_3$  and  $\text{Br}_2$  Raman signals.

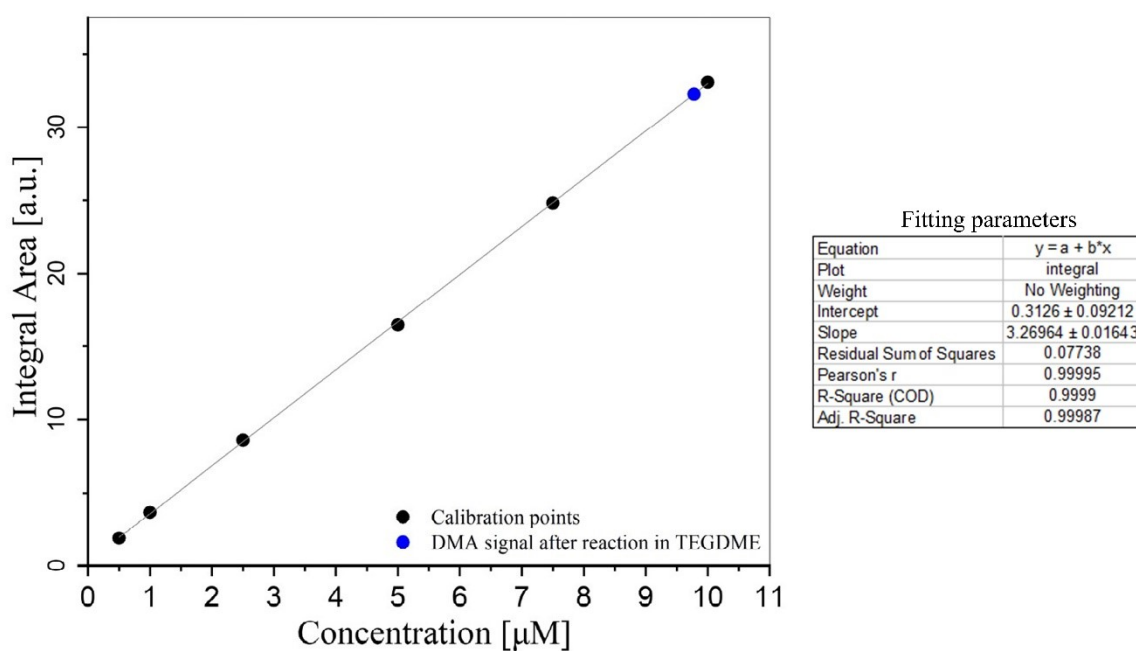

**Figure S4.** Calibration line and corresponding fitting parameters for accurate calculation of DMA concentration after the oxidation of  $\text{Li}_2\text{O}_2$  by  $\text{Br}_3^-$  in TEGDME (blue dot).

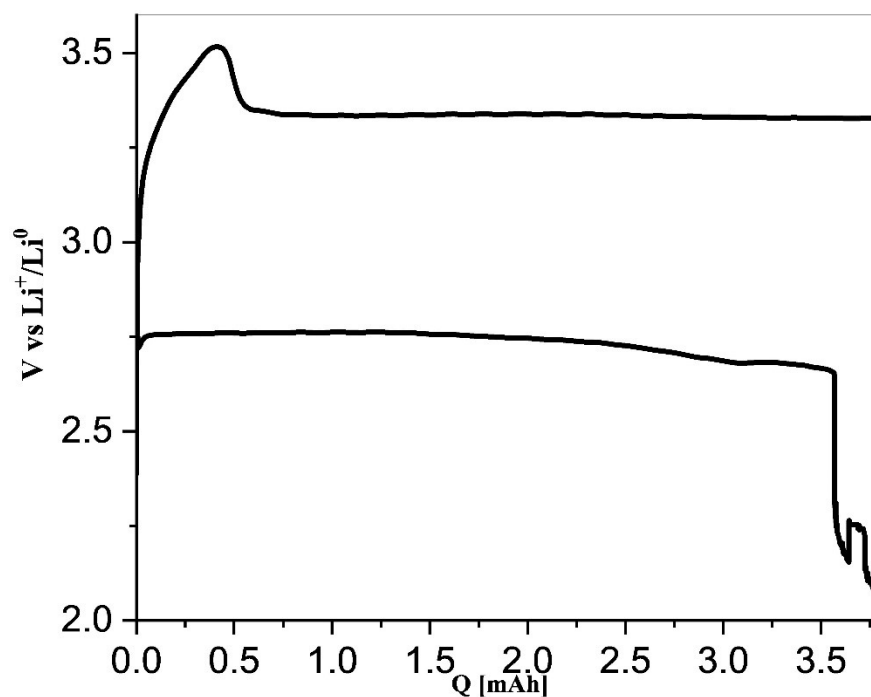

**Figure S5.** Discharge/charge profiles of a Li-O<sub>2</sub> cell cycled at 0.1 mA/cm<sup>2</sup> between 2.0 and 3.6 V vs. Li<sup>+</sup>/Li<sup>0</sup>, with no capacity limit, using a LiTFSI 1M + LiBr 200 mM in DMSO electrolyte.

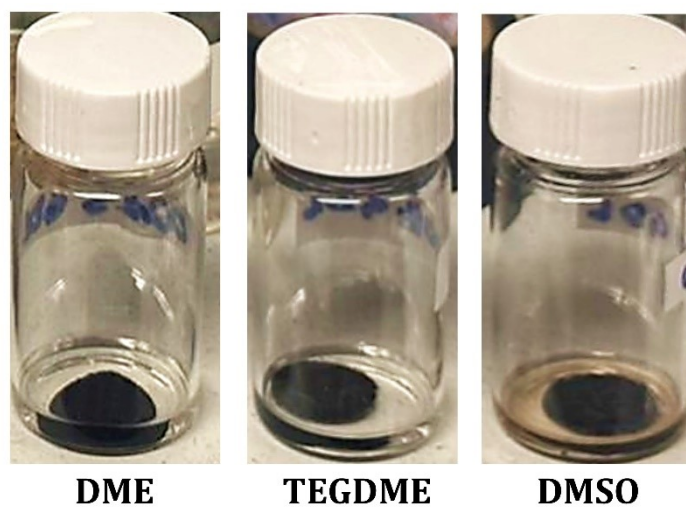

**Figure S6.** Pictures of GDL cathodes washed with fresh solvent and recovered after the cycling procedures for each electrolyte formulation.

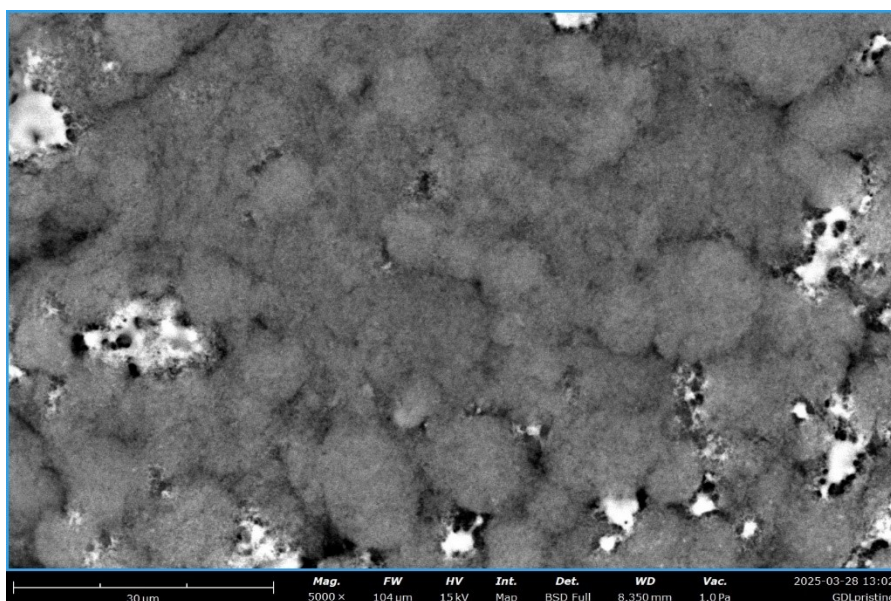

**Figure S7.** Scanning Electron Microscopy image (5.000x magnification, working distance of 8.35 mm, 15kV electron beam energy) of the pristine Gas Diffusion Layer cathode.

**Table S2.** EDX elemental quantitative analysis of the pristine Gas Diffusion Layer.

| Sample                    | Atomic % |     |     |      |
|---------------------------|----------|-----|-----|------|
|                           | C        | O   | S   | F    |
| GDL <sub>(Pristine)</sub> | 84.07    | 1.8 | 0.2 | 13.8 |

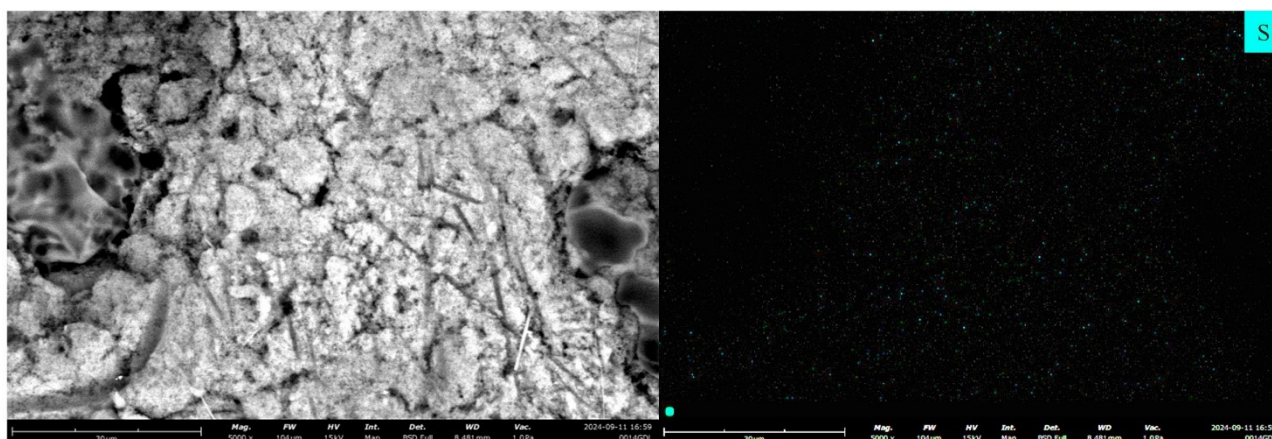

**Figure S8.** SEM image (5.000x magnification, 15kV electron beam energy, working distance 8.48 mm) of cycled GDL<sub>(TEGDME)</sub> and corresponding EDX elemental mapping of Sulfur.

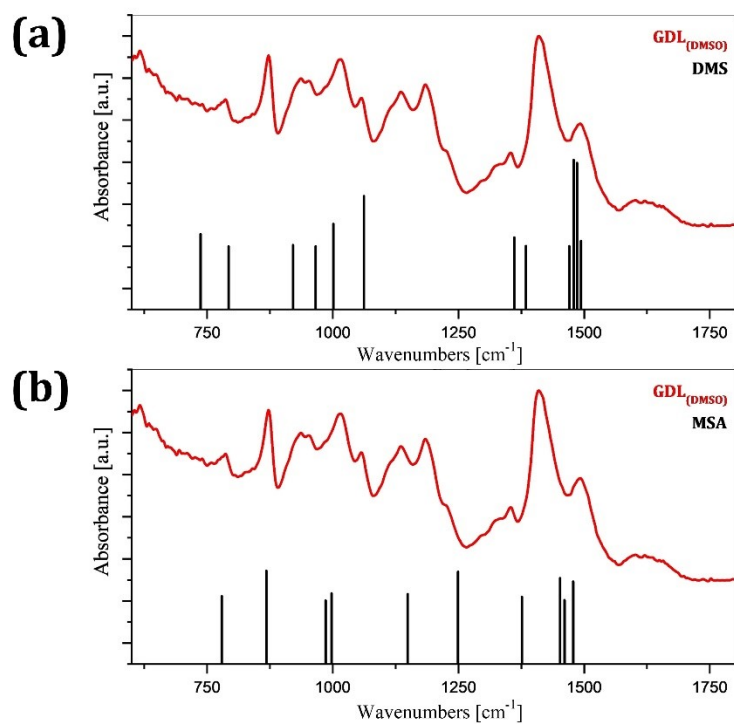

**Figure S9.** Comparison between  $GDL_{(DMSO)}$  spectrum and theoretical FTIR signals of (a) dimethyl sulfide (DMS) and (b) methanesulfonic acid (MSA).

## References

1. Hong, Y. S. *et al.* Safe Lithium-Metal Anodes for Li-O<sub>2</sub> Batteries: From Fundamental Chemistry to Advanced Characterization and Effective Protection. *Batter. Supercaps* **2**, 638–658 (2019).
